# Supplementary material
Source: PubMed Central journal article supplement (PMC2676038)

## HEME-BASED REDOX SENSING BY DOSS FROM *MYCOBACTERIUM TUBERCULOSIS*

Ha Yeon Cho, Hyo Je Cho, Young Min Kim, Jeong Il Oh, and Beom Sik Kang

### Supplemental Figure Legends

Supplemental Fig. S1. Two DosS GAF-A molecules are in an asymmetric unit. *A.* Superimposition of Mol-A (cyan) on Mol-B (orange) based on the C<sub>α</sub> atoms. The two structures are almost identical except for the β1-β2 loop and α3 helix regions (blue for Mol-A and red for Mol-B). *B.* The β4-β5 loop from Mol-A (blue) and β1 strand from Mol-B (red) in an asymmetric unit are in close contact with Y148 (ball and stick) from neighboring molecules.

Supplemental Fig. S2. Ribbon diagrams of GAF and PAS domains. *A.* DosS GAF-A containing a heme group from *Mycobacterium tuberculosis*. *B.* DevS GAF-B domain from *M. smegmatis*. *C.* The first GAF domain containing a cyclic AMP from cyanobacterial adenylyl cyclase. *D.* Dos PAS domain containing a heme group from *Escherichia coli*.

Supplemental Figure S1

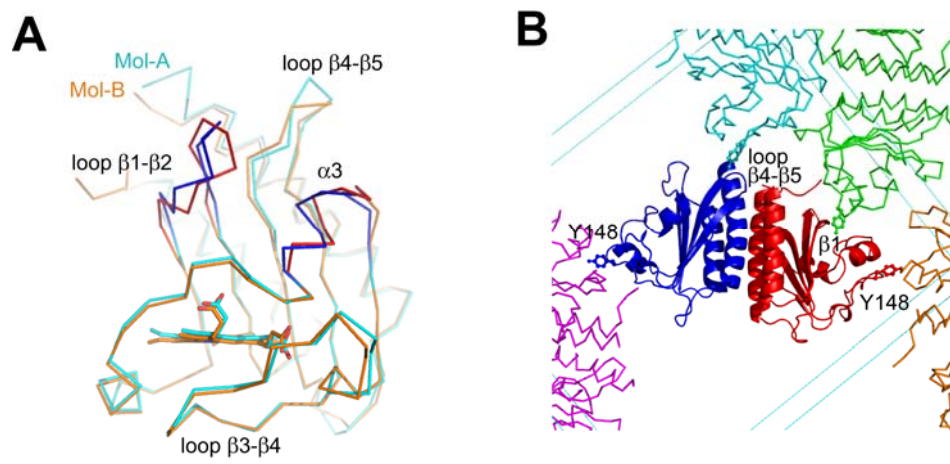

Supplemental Figure S2

**A**

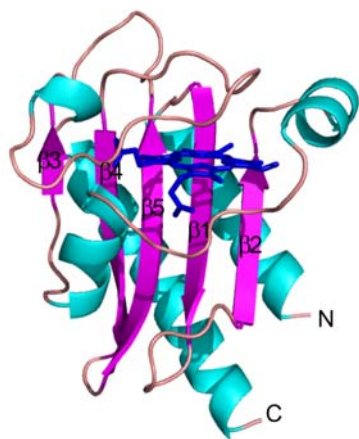

**B**

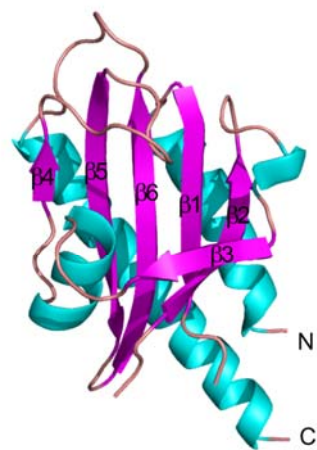

**C**

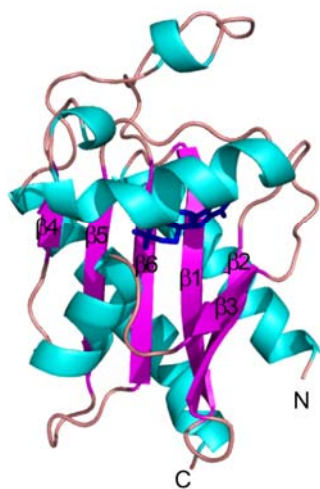

**D**

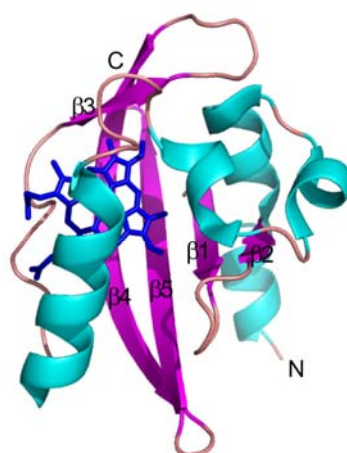

Supplement: M808905200_1.pdf [file M808905200_1.pdf]
